# Supplementary material for: Monitoring of trace oxytetracycline using a porphyrin-MOF layer-based electrochemical aptasensor
Source: Royal Society of Chemistry journal article supplement (doi:10.1039/d4cc03645j), 2024-01-01
Supplement: d4cc03645j1.pdf [file d4cc03645j1.pdf]

*Electronic Supplementary Information*

**Monitoring of trace oxytetracycline using a porphyrin-MOF  
layer-based electrochemical aptasensor**

Ping Li,<sup>a,†</sup> Shan Zhang,<sup>a,†</sup> Jie Xi,<sup>a</sup> Xinying Kong,<sup>a</sup> Hongming He,<sup>\*a,b</sup> Cheng-Peng Li,<sup>\*a</sup> and  
Feng Guo<sup>b\*</sup>

<sup>a</sup> College of Chemistry, Academy of Interdisciplinary Studies on Intelligent Molecules, Tianjin Key  
Laboratory of Structure and Performance for Functional Molecules, Tianjin Normal University, Tianjin  
300387, P. R. China.

<sup>b</sup> School of Laboratory Medicine, Youjiang Medical University for Nationalities, Baise, 533000 Guangxi, P.  
R. China.

\* Corresponding authors. E-mail: guofeng1510@yeah.net (F. Guo); hehongminghz@163.com (H. He)

***Chem. Commun.***

## Experimental detail

**Material and general method.** Chemicals and solvents were obtained through commercial purchase. The oxytetracycline (OTC) aptamer (5'-GGA ATT CGC TAG CAC GTT GAC GCT GGT GCC CGG TTG TGG TGC GAG TGT TGT GTG GAT CCG AGC TCC ACG TG-3') was purchased from Shanghai Sangon Biotechnology Co., Ltd. Fourier transform infrared (FT-IR) spectra were collected on a Bruker ALPHA-T FT-IR spectrometer. Powder X-ray diffraction (PXRD) patterns were measured on a Haoyuan-DX-2700BH. The morphology and microstructure were carried out on a Nova Nano SEM 230 scanning electron microscope (SEM) and Tecnai G<sup>2</sup> F20 S-TWIN transmission electron microscope (TEM). X-ray photoelectron spectra (XPS) were carried out on an AXIS Ultra DLD X-ray photoelectron spectroscopy.

## Synthesis

The synthetic procedure was similar with a previous report.<sup>1</sup> The synthetic process of the bulk Cu-TCPP: Cu(NO<sub>3</sub>)<sub>2</sub>·3H<sub>2</sub>O (15.0 mg) was dissolved in a mixed solution of *N,N*-dimethylformamide (DMF, 9.0 mL) and ethanol (EtOH, 3.0 mL). Then, tetrakis(4-carboxyphenyl)porphyrin (TCPP, 12.0 mg) was added in the above solution and stirred for 10 min. The resultant reaction system was added in to a Teflon-lined autoclave and heated at 80 °C for 24 h. The obtained samples were washed by methanol (MeOH) and dried in air. For the Cu-TCPP nanolayer, the synthetic process was similar with the bulk Cu-TCPP, but PVP (20.0 mg) was introduced in the Cu(NO<sub>3</sub>)<sub>2</sub>·3H<sub>2</sub>O mixed solution of DMF and EtOH. The other procedure was same with the bulk Cu-TCPP.

## Electrochemical aptasensor

KCl (0.10 g), NaCl (4.00 g), KH<sub>2</sub>PO<sub>4</sub> (0.12 g), and Na<sub>2</sub>HPO<sub>4</sub> (0.73 g) were dissolved in distilled pure water (0.5 L) with the pH value of ~7.4. K<sub>3</sub>Fe(CN)<sub>6</sub> (0.83 g) and K<sub>4</sub>Fe(CN)<sub>6</sub>

(1.06 g) were dissolved in the above solution to prepare the used electrolyte. The as-synthesized samples, including bulk Cu-TCPP, Cu-TCPP nanolayer, and CuO, were dispersed in water to obtain a material dispersion ( $0.5 \text{ mg L}^{-1}$ ).  $1.0 \text{ }\mu\text{L}$  suspension was covered on the glassy carbon electrode (GCE), resulting in the formation the functional material-modified electrode (material/GCE). The material/GCE was incubated in an aptamer solution ( $0.01 \text{ pg mL}^{-1}$ ) for 5 min to obtain the electrochemical aptasensor (aptamer/material/GCE). The fabricated aptasensor was immersed in the OTC solution at different concentrations for 5 min to collect the electrochemical responsive signal.

### **Electrochemical measurement**

Electrochemical measurements were carried out on a Shanghai Chenhua CHI760E workstation with GCE as working electrode, Ag/AgCl reference electrode (saturated KCl), and Pt slide as counter electrode. KCl (0.1 M) and  $[\text{Fe}(\text{CN})_6]^{3-/4-}$  (0.5 M) were prepared as the electrolyte.

### **Real sample**

Tap water was centrifugated for 10 min at 12,000 rpm to collect the supernatant, which was further filtered through filter membrane ( $0.22 \text{ }\mu\text{m}$ ). The milk (2.0 mL) was diluted into ultrapure water (8.0 mL), which was treated by a mixture of 10% trichloroacetic acid and chloroform (6.0 mL) for 30 min. The used milk was collected by centrifugation treatment for 10 min at 12,000 rpm.

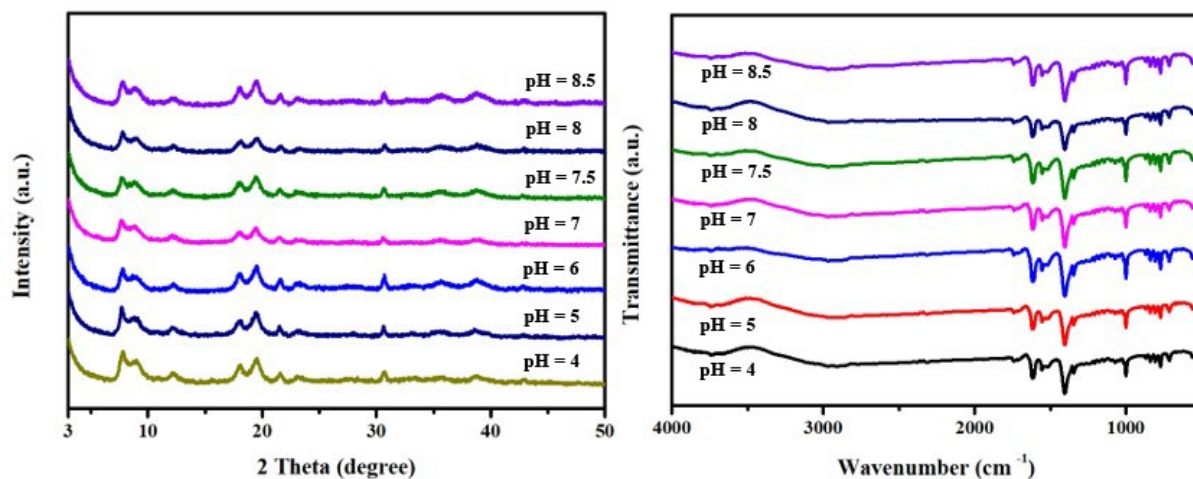

**Fig. S1** (a) PXRD patterns and (b) FT-IR spectra of the as-synthesized Cu-TCPP after immersing in different pH aqueous solutions for 30 min.

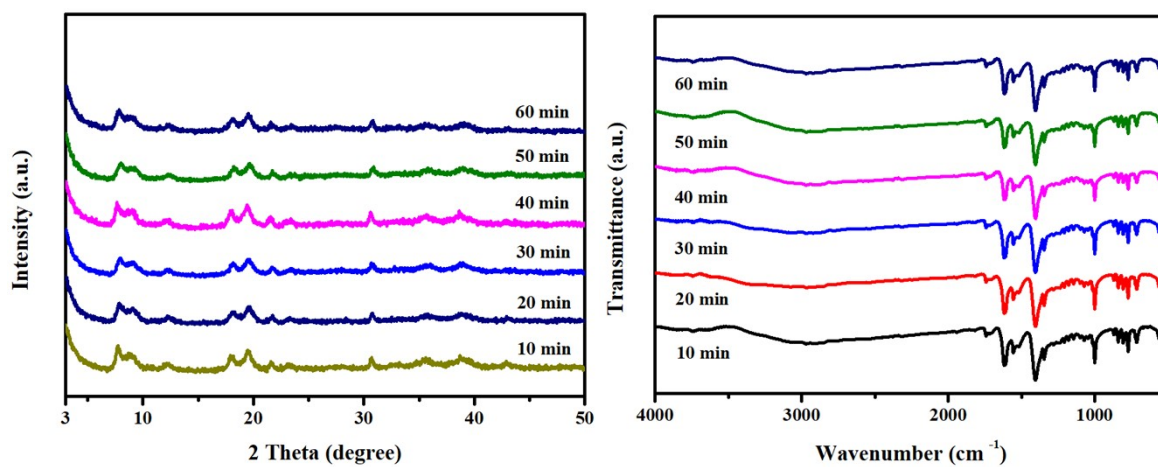

**Fig. S2** (a) PXRD patterns and (b) FT-IR spectra of the as-synthesized Cu-TCPP after immersing in phosphate buffer solutions at different times.

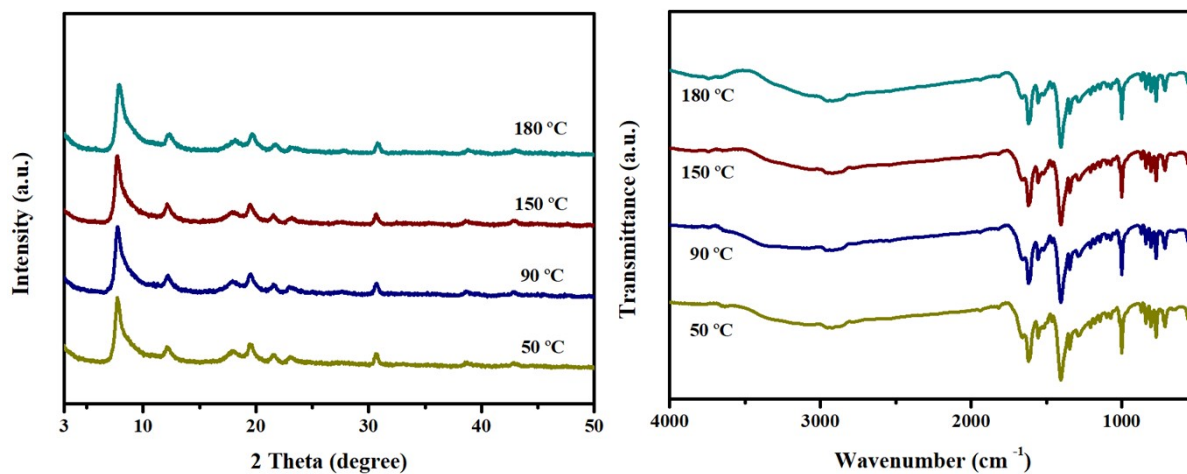

**Fig. S3** (a) PXRD patterns and (b) FT-IR spectra of the as-synthesized Cu-TCPP after heating at different temperatures for 30 min.

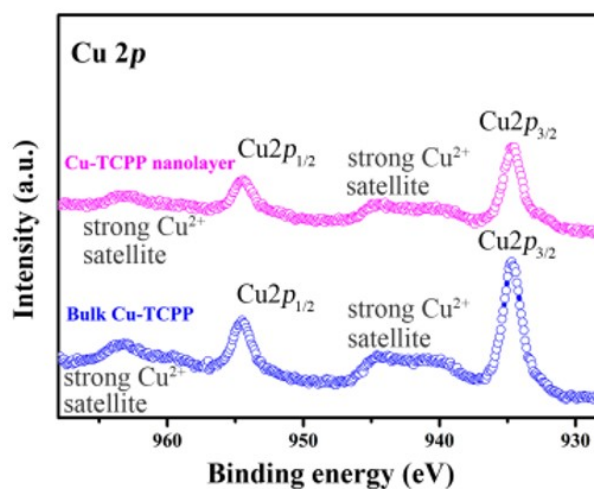

**Fig. S4** The high-resolution Cu 2p XPS of as-synthesized samples.

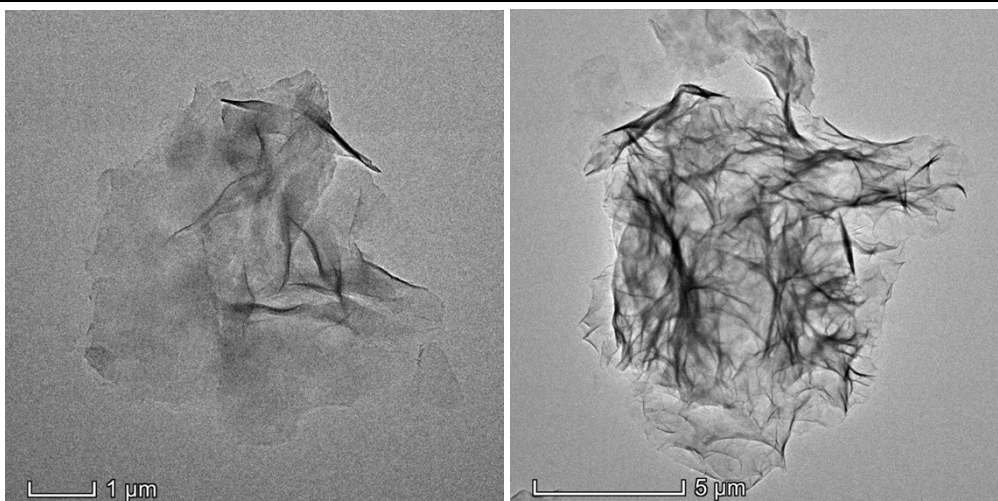

**Fig. S5** TEM images of the as-synthesized Cu-TCPP nanolayer.

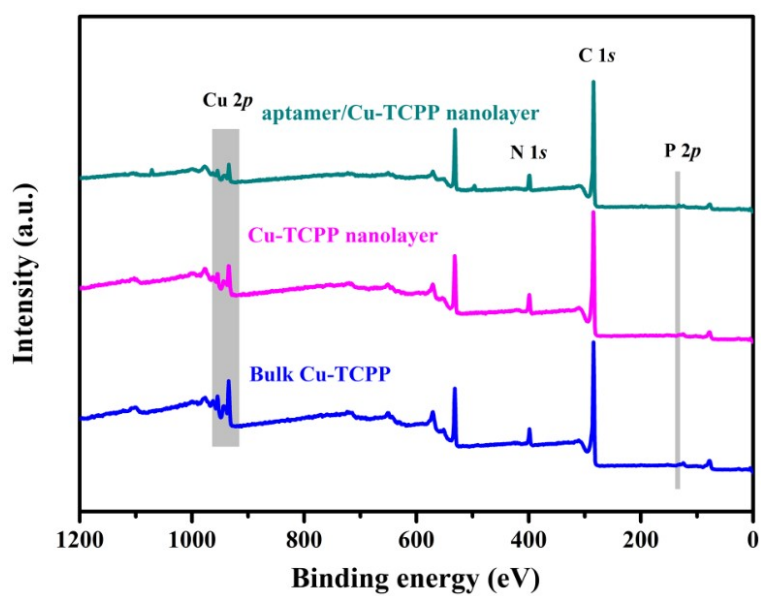

**Fig. S6** The full XPS of different samples.

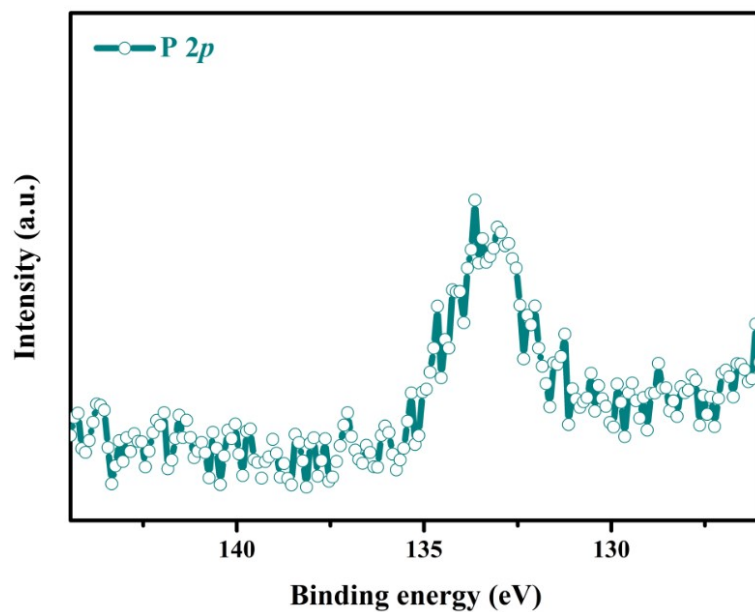

**Fig. S7** The P 2p XPS of the aptamer/Cu-TCPP nanolayer.

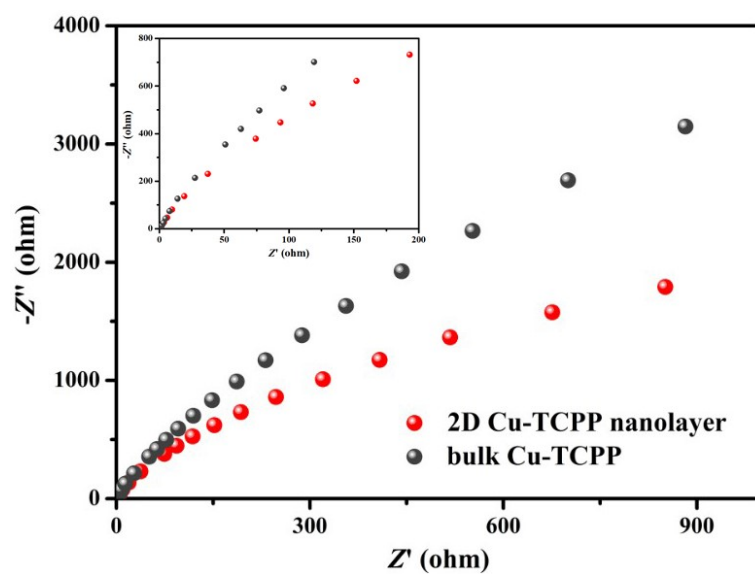

**Fig. S8** EIS Nyquist plots of both samples (insert a local magnification figure).

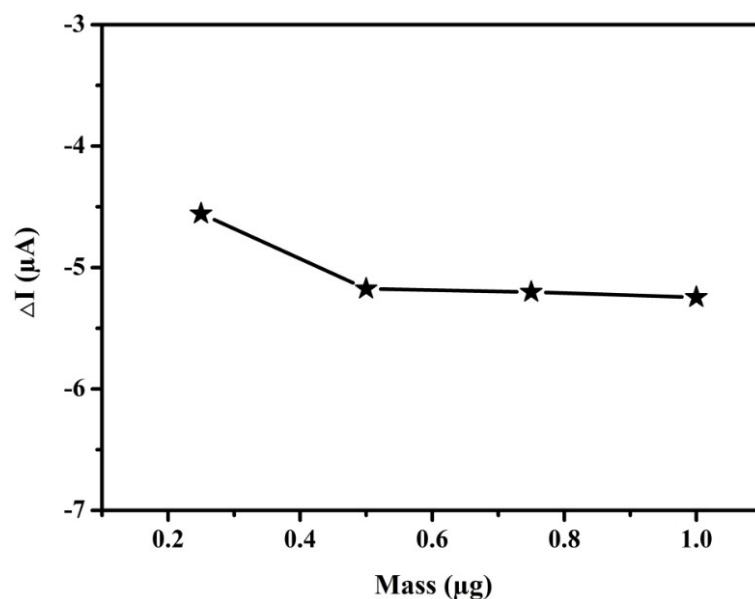

**Fig. S9** The  $\Delta I$  value of the adding mass of the Cu-TCPP nanolayer on the GCE surface.

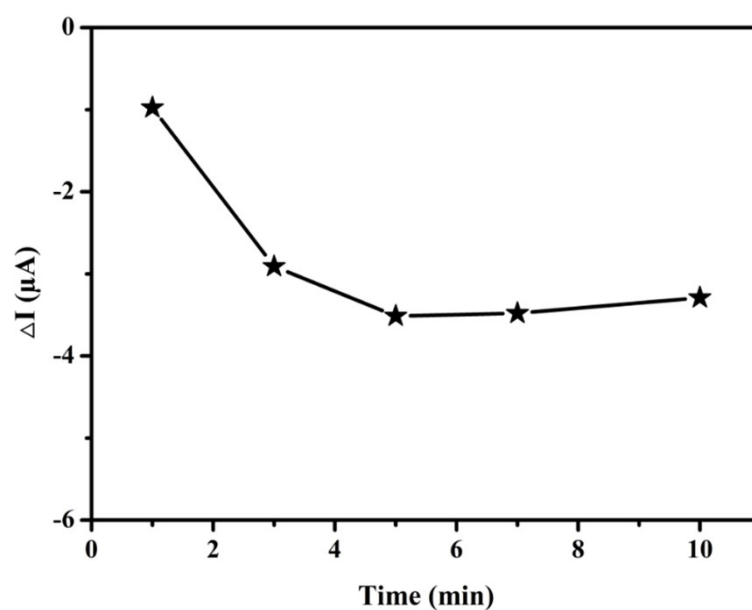

**Fig. S10** The relationship between the  $\Delta I$  value and the immersed time of the fabricated Cu-TCPP nanolayer-based electrochemical aptasensor in the OTC ( $0.01 \text{ pg mL}^{-1}$ ) solution.



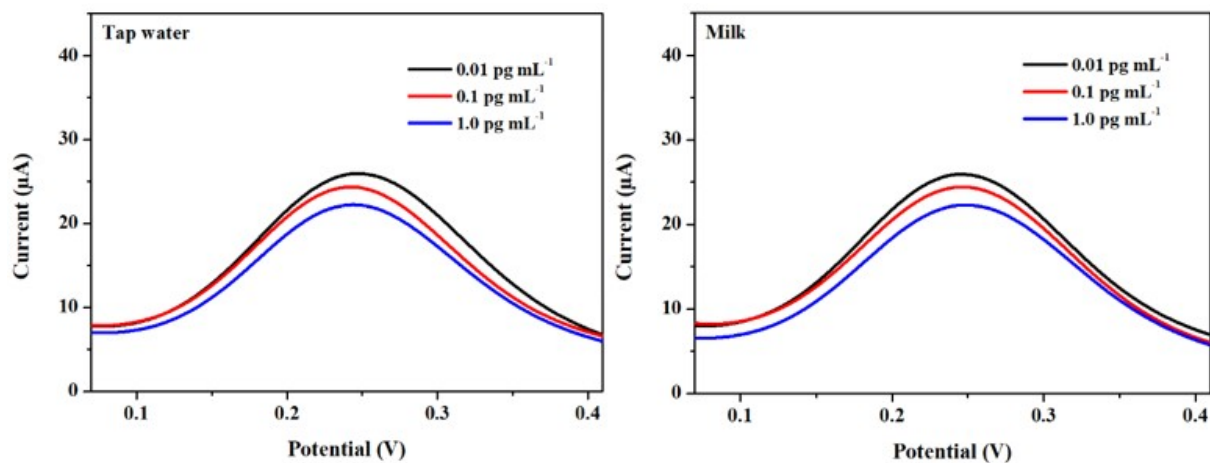

**Fig. S11** The DPV curves of the fabricated aptasensor in the tested real samples.

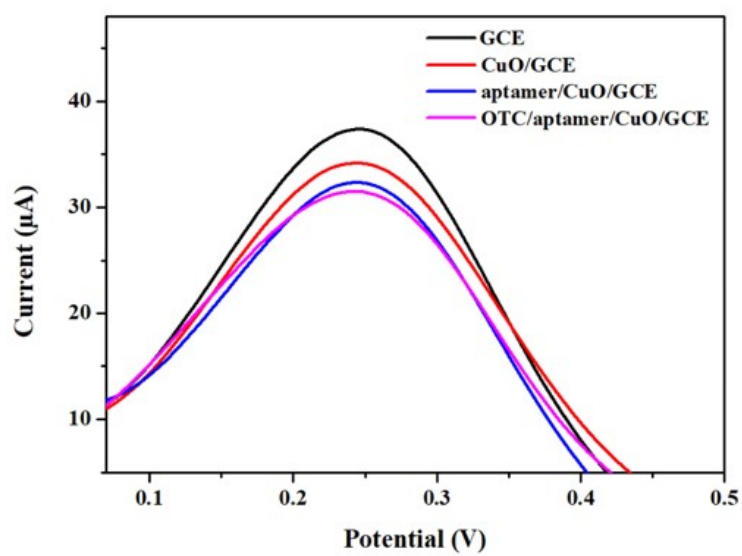

**Fig. S12** The DPV curves of the aptasensor based on CuO.

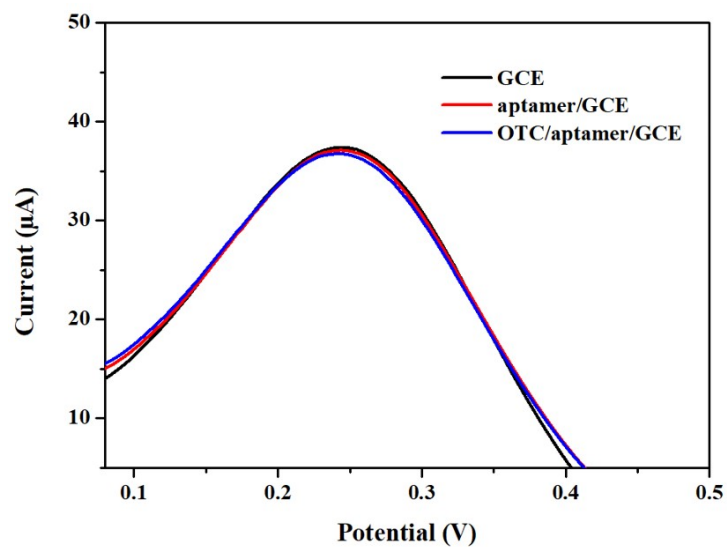

**Fig. S13** The DPV curves of the aptasensor based on a blank GCE.

## References

1. D. Yang, S. Zuo, H. Yang, Y. Zhou and X. Wang, *Angew. Chem. Int. Ed.*, 2020, **59**, 18954.
